# Supplementary material for: Behaviour change techniques that constitute effective planning interventions to improve physical activity and diet behaviour for people with chronic conditions: a systematic review
Source: HighWire-hosted journal article supplement (doi:10.1136/bmjopen-2021-058229), 2022-08-01
Supplement: bmjopen-2021-058229supp004_data_supplement.pdf [file bmjopen-2021-058229supp004_data_supplement.pdf]

## Additional file 4. Fidelity assessment of planning interventions

| Study (Author, published year) | Fidelity assessment item                                                                          |                                                                                              |                                                                                                |                                                                                                |                                                                                              |
|--------------------------------|---------------------------------------------------------------------------------------------------|----------------------------------------------------------------------------------------------|------------------------------------------------------------------------------------------------|------------------------------------------------------------------------------------------------|----------------------------------------------------------------------------------------------|
|                                | Treatment delivery (Is there any description of standardized procedure of planning intervention?) | Study design (Was there any auxiliary means for participants making qualified action plans?) | Provider training (Is there any description about standard training for intervention provider) | Enactment of Treatment skills (Was the action plan made by participant measured or documented) | Treatment receipt (Was the quality of action plans made by participant ensured or reviewed?) |
| Almeida et al. 2015            | Yes                                                                                               | Yes                                                                                          | Online session                                                                                 | No                                                                                             | No                                                                                           |
| Armitage et al.                | Yes                                                                                               | Yes                                                                                          | Online session                                                                                 | No                                                                                             | Yes                                                                                          |
| Armitage et al.                | Yes                                                                                               | Yes                                                                                          | Online session                                                                                 | No                                                                                             | Yes                                                                                          |
| Ayre et al. 2020               | Yes                                                                                               | Yes                                                                                          | No                                                                                             | Yes                                                                                            | Yes                                                                                          |
| Bélanger-Gravel et al. 2013    | Yes                                                                                               | No                                                                                           | No                                                                                             | Yes                                                                                            | Yes                                                                                          |
| Boekhout et al.                | Yes                                                                                               | Yes                                                                                          | Online session                                                                                 | No                                                                                             | No                                                                                           |
| Breslin et al. 2019            | Yes                                                                                               | Yes                                                                                          | No                                                                                             | No                                                                                             | Yes                                                                                          |
| Broekhuizen et al. 2012        | Yes                                                                                               | No                                                                                           | Online session                                                                                 | Yes                                                                                            | No                                                                                           |
| Cheung et al. 2017             | Yes                                                                                               | No                                                                                           | No                                                                                             | Yes                                                                                            | No                                                                                           |
| de Freitas Agondi et al. 2014  | Yes                                                                                               | Yes                                                                                          | No                                                                                             | No                                                                                             | No                                                                                           |
| Dombrowski et al. 2016         | Yes                                                                                               | Yes                                                                                          | No                                                                                             | Yes                                                                                            | No                                                                                           |
| Duan et al. 2018               | No                                                                                                | Yes                                                                                          | Online session                                                                                 | Yes                                                                                            | No                                                                                           |
| Fleig et al. 2011              | No                                                                                                | No                                                                                           | No                                                                                             | Yes                                                                                            | No                                                                                           |
| Göhner et al. 2012             | No                                                                                                | No                                                                                           | No                                                                                             | Yes                                                                                            | No                                                                                           |
| Groeneveld et al. 2011         | No                                                                                                | No                                                                                           | No                                                                                             | No                                                                                             | No                                                                                           |
| Hayes et al. 2020              | Yes                                                                                               | Yes                                                                                          | No                                                                                             | No                                                                                             | Yes                                                                                          |
| Helena et al. 2014             | Yes                                                                                               | No                                                                                           | No                                                                                             | Yes                                                                                            | No                                                                                           |
| Jackson et al. 2005            | Yes                                                                                               | Yes                                                                                          | No                                                                                             | No                                                                                             | No                                                                                           |
| Janssen et al. 2014            | No                                                                                                | No                                                                                           | No                                                                                             | No                                                                                             | No                                                                                           |
| Kim et al. 2019                | No                                                                                                | Yes                                                                                          | No                                                                                             | No                                                                                             | No                                                                                           |
| Leung et al. 2019              | Yes                                                                                               | No                                                                                           | No                                                                                             | No                                                                                             | No                                                                                           |

| <b>Study (Author, published year)</b> | Treatment delivery (Is there any description of standardized procedure of planning intervention?) | Study design (Was there any auxiliary means for participants making qualified action plans?) | Provider training (Is there any description about standard training for intervention provider) | Enactment of Treatment skills (Was the action plan made by participant measured or documented) | Treatment receipt (Was the quality of action plans made by participant ensured or reviewed?) |
|---------------------------------------|---------------------------------------------------------------------------------------------------|----------------------------------------------------------------------------------------------|------------------------------------------------------------------------------------------------|------------------------------------------------------------------------------------------------|----------------------------------------------------------------------------------------------|
| Luszczynska 2006                      | Yes                                                                                               | Yes                                                                                          | No                                                                                             | Yes                                                                                            | Yes                                                                                          |
| Luszczynska, Scholz et al. 2007       | Yes                                                                                               | Yes                                                                                          | No                                                                                             | No                                                                                             | Yes                                                                                          |
| Luszczynska, Sobczyk et al. 2007      | Yes                                                                                               | Yes                                                                                          | No                                                                                             | Yes                                                                                            | Yes                                                                                          |
| Obara-Golebiowska et al. 2015         | Yes                                                                                               | No                                                                                           | No                                                                                             | No                                                                                             | Yes                                                                                          |
| Rodrigues et al. 2013                 | Yes                                                                                               | No                                                                                           | No                                                                                             | No                                                                                             | Yes                                                                                          |
| Rodgers et al. 2014                   | Yes                                                                                               | Yes                                                                                          | No                                                                                             | No                                                                                             | No                                                                                           |
| Scholz et al. 2007                    | Yes                                                                                               | Yes                                                                                          | Yes                                                                                            | Yes                                                                                            | Yes                                                                                          |
| Scholz et al. 2013                    | Yes                                                                                               | Yes                                                                                          | Yes                                                                                            | Yes                                                                                            | Yes                                                                                          |
| Sniehotta et al.                      | Yes                                                                                               | Yes                                                                                          | No                                                                                             | Yes                                                                                            | Yes                                                                                          |
| Sniehotta et al.                      | Yes                                                                                               | Yes                                                                                          | Yes                                                                                            | No                                                                                             | Yes                                                                                          |
| Sniehotta et al.                      | No                                                                                                | Yes                                                                                          | No                                                                                             | Yes                                                                                            | Yes                                                                                          |
| Soureti et al. 2011a                  | Yes                                                                                               | Yes                                                                                          | Online session                                                                                 | Yes                                                                                            | Yes                                                                                          |
| Soureti et al. 2011b                  | Yes                                                                                               | Yes                                                                                          | Online session                                                                                 | Yes                                                                                            | Yes                                                                                          |
| Stevens et al. 2001                   | No                                                                                                | No                                                                                           | No                                                                                             | No                                                                                             | No                                                                                           |
| Ströbl et al. 2013                    | Yes                                                                                               | Yes                                                                                          | Yes                                                                                            | No                                                                                             | Yes                                                                                          |
| Svetkey et al. 2008                   | Yes                                                                                               | Yes                                                                                          | No                                                                                             | No                                                                                             | Yes                                                                                          |
| Thoolen et al. 2009                   | Yes                                                                                               | Yes                                                                                          | No                                                                                             | No                                                                                             | Yes                                                                                          |
| van Genugten et al. 2014              | Yes                                                                                               | Yes                                                                                          | Online session                                                                                 | Yes                                                                                            | No                                                                                           |
| Vinkers et al. 2014                   | Yes                                                                                               | Yes                                                                                          | Yes                                                                                            | No                                                                                             | Yes                                                                                          |
| Wilczynska et al. 2019                | Yes                                                                                               | Yes                                                                                          | No                                                                                             | Yes                                                                                            | No                                                                                           |
| Wooldridge et al. 2019                | Yes                                                                                               | Yes                                                                                          | No                                                                                             | No                                                                                             | Yes                                                                                          |
| Zakrisson et al.                      | Yes                                                                                               | No                                                                                           | Yes                                                                                            | No                                                                                             | Yes                                                                                          |
| Zandstra et al. 2010                  | Yes                                                                                               | Yes                                                                                          | No                                                                                             | No                                                                                             | No                                                                                           |

| <b>Study (Author, published year)</b> | Treatment delivery (Is there any description of standardized procedure of planning intervention?) | Study design (Was there any auxiliary means for participants making qualified action plans?) | Provider training (Is there any description about standard training for intervention provider) | Enactment of Treatment skills (Was the action plan made by participant measured or documented) | Treatment receipt (Was the quality of action plans made by participant ensured or reviewed?) |
|---------------------------------------|---------------------------------------------------------------------------------------------------|----------------------------------------------------------------------------------------------|------------------------------------------------------------------------------------------------|------------------------------------------------------------------------------------------------|----------------------------------------------------------------------------------------------|
| Silva et al. 2020                     | Yes                                                                                               | Yes                                                                                          | No                                                                                             | No                                                                                             | Yes                                                                                          |
| Christiansen et al. 2010              | Yes                                                                                               | Yes                                                                                          | No                                                                                             | No                                                                                             | Yes                                                                                          |
| Gagnon-Girouard et al. 2010           | No                                                                                                | No                                                                                           | No                                                                                             | No                                                                                             | No                                                                                           |
| Richardson et al. 2012                | Yes                                                                                               | Yes                                                                                          | Yes                                                                                            | Yes                                                                                            | No                                                                                           |
| Miller et al. 2016                    | Yes                                                                                               | No                                                                                           | No                                                                                             | Yes                                                                                            | Yes                                                                                          |
| Kwasnicka et al. 2020                 | Yes                                                                                               | No                                                                                           | Yes                                                                                            | Yes                                                                                            | Yes                                                                                          |
| Kivelä et al. 2020                    | Yes                                                                                               | Yes                                                                                          | Yes                                                                                            | No                                                                                             | No                                                                                           |
| Osborn et al. 2018                    | No                                                                                                | No                                                                                           | Yes                                                                                            | Yes                                                                                            | No                                                                                           |
