# Supplementary material for: Behaviour change techniques that constitute effective planning interventions to improve physical activity and diet behaviour for people with chronic conditions: a systematic review
Source: HighWire-hosted journal article supplement (doi:10.1136/bmjopen-2021-058229), 2022-08-01
Supplement: bmjopen-2021-058229supp006_data_supplement.pdf [file bmjopen-2021-058229supp006_data_supplement.pdf]

## Additional file 6. Intervention effectiveness coding

| Study (Author, published year)   | Dependent variable | Group ID | Follow up time (month) | Intervention effectiveness | Category of key indicator | Effect size magnitude | Statistical power of group difference in outcome (1-significant, 0-insignificant) |
|----------------------------------|--------------------|----------|------------------------|----------------------------|---------------------------|-----------------------|-----------------------------------------------------------------------------------|
| Luszczynska, Scholzc et al. 2007 | Diet behavior      | d1       | 6                      | Effective                  | Self-reported behavior    | Medium                | 1                                                                                 |
| Luszczynska, Sobczyk et al. 2007 | Diet behavior      | d2       | 2                      | Effective                  | Physiological             | Small                 | 1                                                                                 |
| Soureti et al. 2011a             | Diet behavior      | d3       | 1.25                   | Effective                  | Self-reported behavior    | Medium                | 1                                                                                 |
| Soureti et al. 2011a             | Diet behavior      | d4       | 1.25                   | Ineffective                | Self-reported behavior    | No effect             | 0                                                                                 |
| Soureti et al. 2011b             | Diet behavior      | d5       | 1.25                   | Effective                  | Self-reported behavior    | Small                 | 1                                                                                 |
| Soureti et al. 2011b             | Diet behavior      | d6       | 1.25                   | Ineffective                | Self-reported behavior    | No effect             | 0                                                                                 |
| Broekhuizen et al. 2012          | Diet behavior      | d7       | 12                     | Ineffective                | Physiological             | No effect             | 0                                                                                 |
| Scholz et al. 2013               | Diet behavior      | d8       | 6                      | Ineffective                | Self-reported behavior    | No effect             | 0                                                                                 |
| Ströbl et al. 2013               | Diet behavior      | d9       | 6                      | Ineffective                | Physiological             | No effect             | 0                                                                                 |
| de Freitas Agondi et al. 2014    | Diet behavior      | d10      | 2.5                    | Effective                  | Physiological             | Medium                | 1                                                                                 |
| Helena et al. 2014               | Diet behavior      | d11      | 6                      | Effective                  | Physiological             | Medium                | 1                                                                                 |
| Janssen et al. 2014              | Diet behavior      | d12      | 6                      | Effective                  | Physiological             | Small                 | 1                                                                                 |

| Study (Author, published year) | Dependent variable | Group ID | Follow up time (month) | Intervention effectiveness | Category of key indicator | Effect size magnitude | Statistical power of group difference in outcome (1-significant, 0-insignificant) |
|--------------------------------|--------------------|----------|------------------------|----------------------------|---------------------------|-----------------------|-----------------------------------------------------------------------------------|
| van Genugten et al. 2014       | Diet behavior      | d13      | 6                      | Ineffective                | Physiological             | No effect             | 0                                                                                 |
| Vinkers et al. 2014            | Diet behavior      | d14      | 1                      | Effective                  | Physiological             | Small                 | 1                                                                                 |
| Vinkers et al. 2014            | Diet behavior      | d15      | 1                      | Effective                  | Physiological             | Small                 | 1                                                                                 |
| Obara-Golebiowska et al. 2015  | Diet behavior      | d16      | 0.5                    | Effective                  | Self-reported behavior    | Medium                | 1                                                                                 |
| Armitage et al. 2017           | Diet behavior      | d17      | 6                      | Effective                  | Physiological             | Medium                | 1                                                                                 |
| Cheung et al. 2017             | Diet behavior      | d18      | 6                      | Ineffective                | Physiological             | No effect             | 0                                                                                 |
| Duan et al. 2018               | Diet behavior      | d19      | 2                      | Effective                  | Self-reported behavior    | Large                 | 1                                                                                 |
| Stevens et al. 2001            | Diet behavior      | d20      | 6                      | Effective                  | Physiological             | Medium                | 1                                                                                 |
| Jackson et al. 2005            | Diet behavior      | d21      | 3.2                    | Ineffective                | Self-reported behavior    | No effect             | 0                                                                                 |
| Svetkey et al. 2008            | Diet behavior      | d22      | 30                     | Effective                  | Physiological             | Small                 | 1                                                                                 |
| Svetkey et al. 2008            | Diet behavior      | d23      | 30                     | Effective                  | Physiological             | Small                 | 1                                                                                 |
| Thoolen et al. 2009            | Diet behavior      | d24      | 12                     | Effective                  | Physiological             | Small                 | 1                                                                                 |
| Zandstra et al. 2010           | Diet behavior      | d25      | 1                      | Effective                  | Physiological             | Small                 | 1                                                                                 |

| Study (Author, published year) | Dependent variable | Group ID | Follow up time (month) | Intervention effectiveness | Category of key indicator | Effect size magnitude | Statistical power of group difference in outcome (1-significant, 0-insignificant) |
|--------------------------------|--------------------|----------|------------------------|----------------------------|---------------------------|-----------------------|-----------------------------------------------------------------------------------|
| Sniehotta et al. 2011          | Diet behavior      | d26      | 6                      | Effective                  | Physiological             | Medium                | 1                                                                                 |
| Armitage et al. 2014           | Diet behavior      | d27      | 1                      | Effective                  | Physiological             | Small                 | 1                                                                                 |
| Hayes et al. 2020              | Diet behavior      | d28      | 1                      | Ineffective                | Physiological             | No effect             | 0                                                                                 |
| Hayes et al. 2020              | Diet behavior      | d29      | 1                      | Ineffective                | Physiological             | No effect             | 0                                                                                 |
| Ayre et al. 2020               | Diet behavior      | d30      | 1                      | Ineffective                | Self-reported behavior    | No effect             | 0                                                                                 |
| Ayre et al. 2020               | Diet behavior      | d31      | 1                      | Ineffective                | Self-reported behavior    | No effect             | 0                                                                                 |
| Kim et al. 2019                | Diet behavior      | d32      | 2.25                   | Ineffective                | Physiological             | No effect             | 0                                                                                 |
| Kim et al. 2019                | Diet behavior      | d33      | 2.25                   | Ineffective                | Physiological             | No effect             | 0                                                                                 |
| Groeneveld et al. 2011         | Diet behavior      | d34      | 6                      | Ineffective                | Self-reported behavior    | Small                 | 1                                                                                 |
| Fleig et al. 2011              | Diet behavior      | d35      | 1.5                    | Ineffective                | Self-reported behavior    | Small                 | 1                                                                                 |
| Dombrowski et al. 2016         | Diet behavior      | d36      | 2.5                    | Ineffective                | Physiological             | No effect             | 0                                                                                 |
| Göhner et al. 2012             | Diet behavior      | d37      | 6                      | Effective                  | Physiological             | Medium                | 1                                                                                 |
| Gagnon-Girouard et al. 2010    | Diet behavior      | d38      | 6                      | Ineffective                | Physiological             | No effect             | 0                                                                                 |

| Study (Author, published year)   | Dependent variable | Group ID | Follow up time (month) | Intervention effectiveness | Category of key indicator | Effect size magnitude | Statistical power of group difference in outcome (1-significant, 0-insignificant) |
|----------------------------------|--------------------|----------|------------------------|----------------------------|---------------------------|-----------------------|-----------------------------------------------------------------------------------|
| Gagnon-Girouard et al. 2010      | Diet behavior      | d39      | 6                      | Ineffective                | Physiological             | No effect             | 0                                                                                 |
| Miller et al. 2016               | Diet behavior      | d40      | 3                      | Effective                  | Physiological             | Large                 | 1                                                                                 |
| Kwasnicka et al. 2020            | Diet behavior      | d41      | 6                      | Effective                  | Physiological             | Small                 | 1                                                                                 |
| Kivelä et al. 2020               | Diet behavior      | d42      | 12                     | Ineffective                | Physiological             | No effect             | 0                                                                                 |
| Osborn et al. 2018               | Diet behavior      | d43      | 12                     | Ineffective                | Physiological             | No effect             | 0                                                                                 |
| Luszczynska 2006                 | Physical activity  | p1       | 8                      | Effective                  | Self-reported behavior    | Medium                | 1                                                                                 |
| Sniehotta et al. 2006            | Physical activity  | p2       | 2.5                    | Ineffective                | Self-reported behavior    | No effect             | 0                                                                                 |
| Sniehotta et al. 2006            | Physical activity  | p3       | 2.5                    | Effective                  | Self-reported behavior    | Medium                | 1                                                                                 |
| Luszczynska, Sobczyk et al. 2007 | Physical activity  | p4       | 2                      | Effective                  | Physiological             | Small                 | 1                                                                                 |
| Scholz et al. 2007               | Physical activity  | p5       | 2.5                    | Ineffective                | Self-reported behavior    | No effect             | 0                                                                                 |
| Scholz et al. 2007               | Physical activity  | p6       | 2.5                    | Ineffective                | Self-reported behavior    | Small                 | 1                                                                                 |
| Broekhuizen et al. 2012          | Physical activity  | p7       | 12                     | Ineffective                | Physiological             | No effect             | 0                                                                                 |
| Bélanger-Gravel et al. 2013      | Physical activity  | p8       | 6                      | Effective                  | Device-based              | Medium                | 1                                                                                 |

| Study (Author, published year) | Dependent variable | Group ID | Follow up time (month) | Intervention effectiveness | Category of key indicator | Effect size magnitude | Statistical power of group difference in outcome (1-significant, 0-insignificant) |
|--------------------------------|--------------------|----------|------------------------|----------------------------|---------------------------|-----------------------|-----------------------------------------------------------------------------------|
| Ströbl et al. 2013             | Physical activity  | p9       | 6                      | Ineffective                | Self-reported behavior    | Small                 | 1                                                                                 |
| Helena et al. 2014             | Physical activity  | p10      | 6                      | Ineffective                | Device-based              | No effect             | 0                                                                                 |
| Janssen et al. 2014            | Physical activity  | p11      | 6                      | Effective                  | Device-based              | Medium                | 1                                                                                 |
| van Genugten et al. 2014       | Physical activity  | p12      | 6                      | Ineffective                | Physiological             | No effect             | 0                                                                                 |
| Vinkers et al. 2014            | Physical activity  | p13      | 1                      | Effective                  | Physiological             | Small                 | 1                                                                                 |
| Vinkers et al. 2014            | Physical activity  | p14      | 1                      | Effective                  | Physiological             | Small                 | 1                                                                                 |
| Cheung et al. 2017             | Physical activity  | p15      | 6                      | Ineffective                | Physiological             | No effect             | 0                                                                                 |
| Duan et al. 2018               | Physical activity  | p16      | 2                      | Effective                  | Self-reported behavior    | Medium                | 1                                                                                 |
| Stevens et al. 2001            | Physical activity  | p17      | 6                      | Effective                  | Physiological             | Medium                | 1                                                                                 |
| Sniehotta et al. 2005          | Physical activity  | p18      | 4                      | Ineffective                | Self-reported behavior    | No effect             | 0                                                                                 |
| Sniehotta et al. 2005          | Physical activity  | p19      | 4                      | Ineffective                | Self-reported behavior    | No effect             | 0                                                                                 |
| Svetkey et al. 2008            | Physical activity  | p20      | 30                     | Effective                  | Device-based              | Small                 | 1                                                                                 |
| Svetkey et al. 2008            | Physical activity  | p21      | 30                     | Effective                  | Device-based              | Small                 | 1                                                                                 |

| Study (Author, published year) | Dependent variable | Group ID | Follow up time (month) | Intervention effectiveness | Category of key indicator | Effect size magnitude | Statistical power of group difference in outcome (1-significant, 0-insignificant) |
|--------------------------------|--------------------|----------|------------------------|----------------------------|---------------------------|-----------------------|-----------------------------------------------------------------------------------|
| Thoolen et al. 2009            | Physical activity  | p22      | 12                     | Effective                  | Physiological             | Small                 | 1                                                                                 |
| Sniehotta et al. 2011          | Physical activity  | p23      | 6                      | Effective                  | Physiological             | Medium                | 1                                                                                 |
| Rodrigues et al. 2013          | Physical activity  | p24      | 2                      | Ineffective                | Self-reported behavior    | Small                 | 1                                                                                 |
| Wilczynska et al. 2019         | Physical activity  | p25      | 5                      | Effective                  | Device-based              | Small                 | 1                                                                                 |
| Zakrisson et al. 2019          | Physical activity  | p26      | 12                     | Ineffective                | Device-based              | No effect             | 0                                                                                 |
| Kim et al. 2019                | Physical activity  | p27      | 2.25                   | Ineffective                | Physiological             | No effect             | 0                                                                                 |
| Kim et al. 2019                | Physical activity  | p28      | 2.25                   | Ineffective                | Physiological             | No effect             | 0                                                                                 |
| Groeneveld et al. 2011         | Physical activity  | p29      | 6                      | Ineffective                | Self-reported behavior    | No effect             | 0                                                                                 |
| Almeida et al. 2015            | Physical activity  | p30      | 1                      | Effective                  | Self-reported behavior    | Medium                | 1                                                                                 |
| Almeida et al. 2015            | Physical activity  | p31      | 1                      | Effective                  | Self-reported behavior    | Medium                | 1                                                                                 |
| Silva et al. 2020              | Physical activity  | p32      | 6                      | Effective                  | Physiological             | Small                 | 1                                                                                 |
| Fleig et al. 2011              | Physical activity  | p33      | 1.5                    | Ineffective                | Self-reported behavior    | Small                 | 1                                                                                 |
| Leung et al. 2019              | Physical activity  | p34      | 2.5                    | Ineffective                | Device-based              | No effect             | 1                                                                                 |

| Study (Author, published year) | Dependent variable | Group ID | Follow up time (month) | Intervention effectiveness | Category of key indicator | Effect size magnitude | Statistical power of group difference in outcome (1-significant, 0-insignificant) |
|--------------------------------|--------------------|----------|------------------------|----------------------------|---------------------------|-----------------------|-----------------------------------------------------------------------------------|
| Dombrowski et al. 2016         | Physical activity  | p35      | 2.5                    | Ineffective                | Physiological             | No effect             | 0                                                                                 |
| Göhner et al. 2012             | Physical activity  | p36      | 6                      | Effective                  | Physiological             | Medium                | 1                                                                                 |
| Christiansen et al. 2010       | Physical activity  | p37      | 3                      | Effective                  | Physiological             | Medium                | 1                                                                                 |
| Richardson et al. 2012         | Physical activity  | p38      | 6                      | Effective                  | Self-reported behavior    | Medium                | 1                                                                                 |
| Miller et al. 2016             | Physical activity  | p39      | 3                      | Ineffective                | Device-based              | No effect             | 0                                                                                 |
| Kwasnicka et al. 2020          | Physical activity  | p40      | 3                      | Effective                  | Device-based              | Small                 | 1                                                                                 |
| Kivelä et al. 2020             | Physical activity  | p41      | 12                     | Ineffective                | Physiological             | No effect             | 0                                                                                 |
| Osborn et al. 2018             | Physical activity  | p42      | 12                     | Ineffective                | Physiological             | No effect             | 0                                                                                 |
| Boekhout et al. 2018           | Physical activity  | p43      | 6                      | Inconclusive               | Self-reported behavior    | Unclear               | 0                                                                                 |
| Breslin et al. 2019            | Physical activity  | p44      | 1.5                    | Inconclusive               | Device-based              | Unclear               | 1                                                                                 |
| Rodgers et al. 2014            | Physical activity  | p45      | 6                      | Inconclusive               | Device-based              | Unclear               | 1                                                                                 |
| Wooldridge et al. 2019         | Physical activity  | p46      | 1.5                    | Inconclusive               | Device-based              | Unclear               | 1                                                                                 |
| Wooldridge et al. 2019         | Physical activity  | p47      | 1.5                    | Inconclusive               | Device-based              | Unclear               | 1                                                                                 |
